# Supplementary material for: Clinical global assessment of nutritional status as predictor of mortality in chronic kidney disease patients
Source: PubMed Central journal article supplement (PMC5718431; doi:10.1371/journal.pone.0186659), 2017-12-06
Supplement: pone.0186659.s001.pdf [file pone.0186659.s001.pdf]

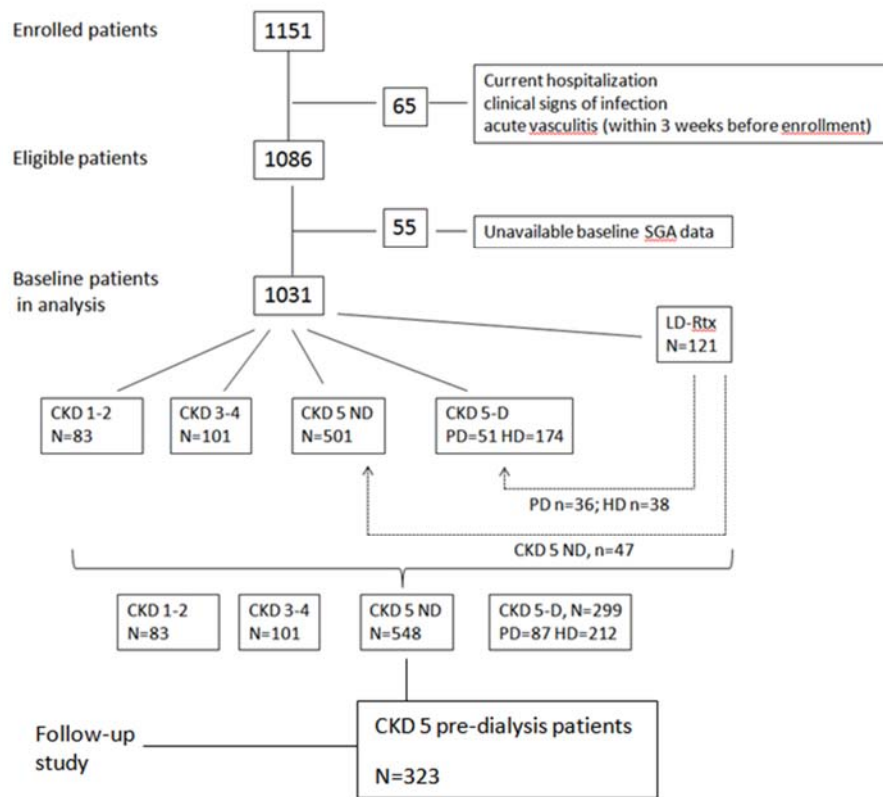

**S1 Fig. Study cohort derivation**

Abbreviations: CKD 5 ND, CKD 5 non-dialysis; CKD 5-D: CKD 5 dialysis dependent; LD-Rtx: Recipients of living donor renal transplant
