# Supplementary material for: Clinical global assessment of nutritional status as predictor of mortality in chronic kidney disease patients
Source: PubMed Central journal article supplement (PMC5718431; doi:10.1371/journal.pone.0186659), 2017-12-06
Supplement: pone.0186659.s002.pdf [file pone.0186659.s002.pdf]

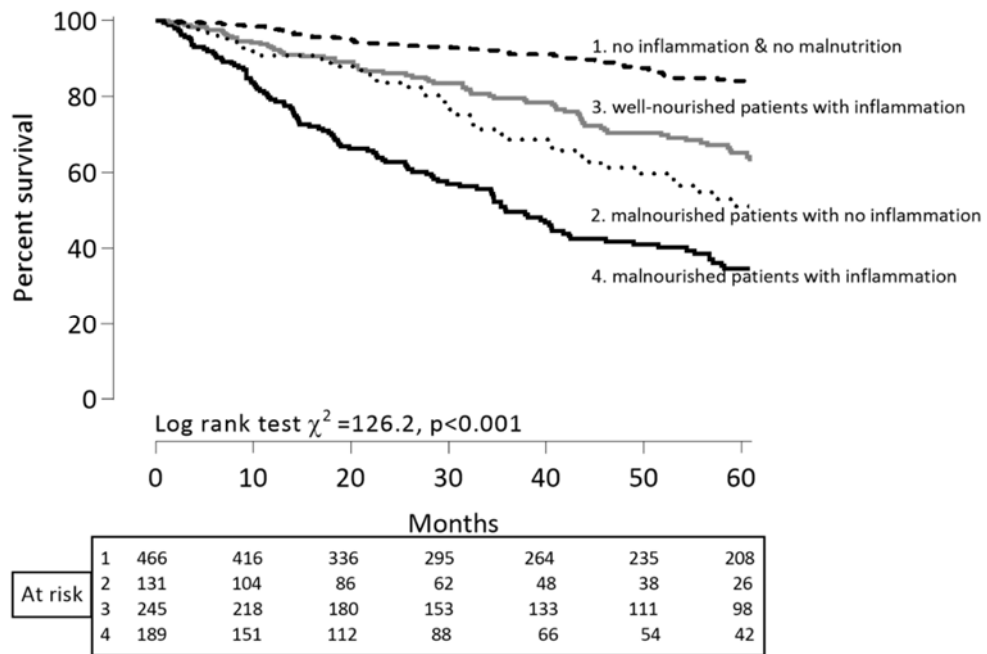

**S2 Fig. Kaplan–Meier plot for all-cause mortality of the four groups classified by the presence or absence of inflammation and PEW.**
