# Supplementary material for: Clinical global assessment of nutritional status as predictor of mortality in chronic kidney disease patients
Source: PubMed Central journal article supplement (PMC5718431; doi:10.1371/journal.pone.0186659), 2017-12-06
Supplement: pone.0186659.s003.pdf [file pone.0186659.s003.pdf]

**S1 Table. Baseline demographic and biochemical characteristics of 1031 patients according to CKD stages.**

|                                               | CKD 1-2<br>(n=83)  | CKD 3-4<br>(n=101) | CKD 5-ND<br>(n=548) | CKD 5D<br>(n=299)  | P value |
|-----------------------------------------------|--------------------|--------------------|---------------------|--------------------|---------|
| <b>Demography</b>                             |                    |                    |                     |                    |         |
| Age (years)                                   | 61 (47 – 75)       | 59 (36 – 74)       | 55 (33 - 69)        | 62 (34 – 80)       | <0.0001 |
| Gender, males (%)                             | 58(70)             | 73(72)             | 346(63)             | 180(60)            | 0.09    |
| Diabetes mellitus, n (%)                      | 7(8)               | 39(39)             | 165(30)             | 58(19)             | <0.0001 |
| CVD, n (%)                                    | 7(8)               | 35(35)             | 192(35)             | 136(45)            | <0.0001 |
| Smoking, n (%) ( n=78/89/446/258)             | 46(59)             | 47(53)             | 225(50)             | 144(56)            | 0.37    |
| Cause of kidney disease, n (%):               |                    |                    |                     |                    | <0.0001 |
| Glomerulonephritis                            | 3(4)               | 26(26)             | 141(26)             | 55(18)             | 0.02    |
| Diabetic nephropathy                          | 0                  | 19(19)             | 140(26)             | 33(11)             | <0.0001 |
| Hypertension/Renal vascular disease           | 0                  | 4(4)               | 113(21)             | 54(18)             | <0.0001 |
| Unknown or other etiology                     | 2(2)               | 52(51)             | 154(28)             | 157(53)            | <0.0001 |
| eGFR (ml/min/1.73 <sup>2</sup> ) <sup>a</sup> | 85.5 (68.5– 109.0) | 27.9 (16.7 – 46.5) | 6.3 (4.0 – 10.3)    | 0 (0-5.3)          | <0.0001 |
| Mean BP(mmHg;n=83/100/505/224)                | 100 (88 – 120)     | 107 (88 – 123)     | 108 (90 – 126)      | 100 (78 – 126)     | <0.0001 |
| <b>Anthropometric measurements</b>            |                    |                    |                     |                    |         |
| Malnutrition, SGA>1, n (%)                    | 2(2)               | 16(16)             | 171(31)             | 131(44)            | <0.0001 |
| %HGS (n=82/98/516/289)                        | 100                | 97 (62 – 133)      | 84 (52 – 119)       | 70(42 – 108)       | <0.0001 |
| BMI (kg/m <sup>2</sup> )                      | 25.3 (20.4 – 30.0) | 26.0 (20.4 – 32.0) | 24.6 (19.9 – 30.7)  | 24.0 (19.0 – 29.8) | 0.001   |
| LBMI (kg/m <sup>2</sup> ; n=80/95/435/280)    | 17.6 (14.7-21.1)   | 18.1 (14.9-21.0)   | 16.9 (13.6-20.2)    | 17.0(13.8-20.5)    | 0.001   |
| FBMI (kg/m <sup>2</sup> ; n=80/95/435/280)    | 7.7 (4.6-10.7)     | 7.6 (4.9-12.0)     | 7.2 (4.0 -11.3)     | 6.9 (3.8-11.3)     | 0.03    |
| <b>Biochemical parameters</b>                 |                    |                    |                     |                    |         |
| Creatinine (μmol/L)                           | 0.9 (0.7- 1.1)     | 2.3 (1.5- 3.7)     | 8.0 (5.1- 11.5)     | 8.3 (5.6- 11.5)    | <0.0001 |

|                                                                          |                 |                  |                   |                   |         |
|--------------------------------------------------------------------------|-----------------|------------------|-------------------|-------------------|---------|
| S-Albumin (g/L)                                                          | 39 (35 – 43)    | 37 (32 – 41)     | 34 (26 – 40)      | 34 (28 – 40)      | <0.0001 |
| Ca×PO <sub>4</sub> (mmol <sup>2</sup> /L <sup>2</sup> ; n=81/98/516/296) | 2.2 (1.8 – 2.7) | 2.8 (2.1 – 4.1)  | 4.5 (3.2 – 6.4)   | 4.1 (2.6 – 6.3)   | <0.0001 |
| iPTH (ng/l ; n=75/92/531/215)                                            | 37 (24 - 62)    | 103 (45 - 188)   | 229 (52 - 595)    | 228 (52 - 586)    | <0.0001 |
| Cholesterol (mmol/L; n=83/100/547/295)                                   | 5.0 (3.9 – 6.5) | 4.9 (3.8 – 6.8)  | 4.8 (3.2 – 7)     | 4.4 (3.2 – 6.2)   | <0.0001 |
| Triglyceride (mmol/L; n=83/99/544/296)                                   | 1.1 (0.7 – 2.6) | 1.8 (0.9 – 3.6)  | 1.7 (0.9 – 3.4)   | 1.5 (0.8 – 2.8)   | <0.0001 |
| IGF-1 (µg/ml; n=60/78/397/278)                                           | 120 (66 – 193)  | 142 (68 – 230)   | 182 (87 – 334)    | 170 (82 – 318)    | <0.0001 |
| Hemoglobin (g/L ;n=83/100/546/293)                                       | 144 (130 – 155) | 128 (105 – 148)  | 105 (88 – 125)    | 118 (99 – 134)    | <0.0001 |
| hs CRP (mg/L)                                                            | 1.2 (0.4 – 6.4) | 2.5(0.5 – 10.2)  | 4.0 (0.6 – 27.1)  | 4.1 (0.4 – 32)    | <0.0001 |
| IL-6 (pg/ml; n=69/52/510/285)                                            | 1.8 (0.6 – 8.5) | 2.7 (1.7 – 11.9) | 5.5 (1.4 – 16.7)  | 6.3 (1.3 – 21.4)  | <0.0001 |
| TNF (pg/ml; n=41/61/476/285)                                             | 3.8 (2.1 – 7.1) | 7.9 (4.9 – 14.8) | 11.3 (7.1 – 21.0) | 14.2 (9.2 – 20.6) | <0.0001 |

Data presented as median (10<sup>th</sup> - 90<sup>th</sup> percentile), number or percentage.

Abbreviations: CVD, cardiovascular disease; eGFR, estimated glomerular filtration rate; BP, blood pressure; SGA, subjective global assessment; % HGS, handgrip strength as percentage of the controls; BMI, body mass index; LBMI, lean body mass index; FBMI, fat body mass index; S-Albumin, serum-albumin; iPTH, intact parathyroid hormone; IGF-1, insulin-growth like factor -1; hs CRP, high sensitivity C-reactive protein; IL-6, interleukin-6; TNF, tumor necrosis factor.

<sup>a</sup> In hemodialysis patients (HD) who in general had no or minimal renal function, eGFR was assumed to be zero; eGFR in all patients (except HD patients) were estimated by the Chronic Kidney Disease Epidemiology Collaboration (CKD-EPI) formula.
