# Supplementary material for: Clinical global assessment of nutritional status as predictor of mortality in chronic kidney disease patients
Source: PubMed Central journal article supplement (PMC5718431; doi:10.1371/journal.pone.0186659), 2017-12-06
Supplement: pone.0186659.s004.pdf [file pone.0186659.s004.pdf]

**S2 Table. Comparison of CKD patients divided into different age groups**

|                                               | <b>Age≤ 45 years<br/>(n=249)</b> | <b>45&lt;Age&lt;65 years<br/>(n=454)</b> | <b>Age≥ 65 years<br/>(n=328)</b> | <b>P value</b>    |
|-----------------------------------------------|----------------------------------|------------------------------------------|----------------------------------|-------------------|
| <b>Gender, male (%)</b>                       | 154 (62)                         | 292 (64)                                 | 211 (64)                         | 0.78              |
| <b>Diabetes mellitus, n (%)</b>               | 58 (23)                          | 122 (27)                                 | 89 (27)                          | 0.51              |
| <b>CVD, n (%)</b>                             | 26 (10)                          | 165 (36)                                 | 179 (55)                         | <b>&lt;0.0001</b> |
| <b>Dialysis, n (%)</b>                        | 67(27)                           | 99(22)                                   | 133(41)                          | <b>&lt;0.0001</b> |
| <b>SGA&gt;1, n (%)</b>                        | 55 (22)                          | 142 (31)                                 | 123 (38)                         | <b>0.0003</b>     |
| <b>% HGS (n=232/437/316)</b>                  | 100(67-130)                      | 86 (56-114)                              | 70(44-100)                       | <b>&lt;0.0001</b> |
| <b>BMI (kg/m<sup>2</sup>)</b>                 | 23.7(19.3-29.8)                  | 24.8(20.0-31.2)                          | 24.7(20.2-30.2)                  | <b>0.0019</b>     |
| <b>LBMI (kg/m<sup>2</sup>; n=204/395/291)</b> | 17.4 (14.0-20.6)                 | 17.1 (13.8-20.7)                         | 17.0 (14.0-20.1)                 | 0.10              |
| <b>FBMI (kg/m<sup>2</sup>; n=204/395/291)</b> | 6.1 (3.0-9.6)                    | 7.7 (4.6-11.9)                           | 7.8 (4.7-11.1)                   | <b>&lt;0.0001</b> |
| <b>S-Albumin (g/L)</b>                        | 36 (28- 42)                      | 35 (28- 41)                              | 34 (27- 39)                      | <b>0.004</b>      |
| <b>hsCRP (mg/L)</b>                           | 1.8 (0.3-11.7)                   | 3.7 (0.5-29.5)                           | 4.9 (0.9-29.2)                   | <b>&lt;0.0001</b> |

Data presented as median (10<sup>th</sup> - 90<sup>th</sup> percentile), number and percentage.

Abbreviations: CVD, cardiovascular disease; SGA, subjective global assessment; % HGS, handgrip strength as percentage of the controls; BMI, body mass index; LBMI, lean body mass index; FBMI, fat body mass index; S-Albumin, serum-albumin; hsCRP, high sensitivity C-reactive protein
