# Supplementary material for: Clinical global assessment of nutritional status as predictor of mortality in chronic kidney disease patients
Source: PubMed Central journal article supplement (PMC5718431; doi:10.1371/journal.pone.0186659), 2017-12-06
Supplement: pone.0186659.s005.pdf [file pone.0186659.s005.pdf]

**S3 Table. Comparison of male and female CKD patients**

|                                             | Male (n=657)     | Female (n=374)   | P value           |
|---------------------------------------------|------------------|------------------|-------------------|
| <b>Age</b> (years)                          | 58(36-74)        | 58(33-75)        | 0.98              |
| <b>Diabetes mellitus</b> , n (%)            | 183(28)          | 86(23)           | 0.09              |
| <b>CVD</b> , n (%)                          | 262(40)          | 108(29)          | <b>0.0004</b>     |
| <b>Dialysis</b> , n (%)                     | 180(27)          | 119(32)          | 0.13              |
| <b>SGA&gt;1</b> , n (%)                     | 183 (28)         | 137(37)          | <b>0.004</b>      |
| <b>%HGS</b> (n=631/354)                     | 86(50-116)       | 81(48-111)       | <b>0.01</b>       |
| <b>BMI</b> (kg/m <sup>2</sup> )             | 24.7(20.4-27.3)  | 23.9(18.9-28.1)  | 0.05              |
| <b>LBMI</b> (kg/m <sup>2</sup> ; n=570/320) | 18.1 (15.5-21.0) | 15.1 (13.1-18.4) | <b>&lt;0.0001</b> |
| <b>FBMI</b> (kg/m <sup>2</sup> ; n=570/320) | 6.5 (3.8-9.9)    | 8.6 (5.2-12.9)   | <b>&lt;0.0001</b> |
| <b>S-Albumin</b> (g/L)                      | 35 (28- 41)      | 34 (27- 40)      | <b>0.01</b>       |
| <b>hsCRP</b> (mg/L)                         | 3.8(0.5-26)      | 2.8(0.4-27)      | 0.08              |

Data presented as median (10<sup>th</sup> - 90<sup>th</sup> percentile), number and percentage.

Abbreviations: CVD, cardiovascular disease; SGA, subjective global assessment; % HGS, handgrip strength as percentage of the controls; BMI, body mass index; LBMI, lean body mass index; FBMI, fat body mass index; S-Albumin, serum-albumin; hsCRP, high sensitivity C-reactive protein
