# Supplementary material for: Clinical global assessment of nutritional status as predictor of mortality in chronic kidney disease patients
Source: PubMed Central journal article supplement (PMC5718431; doi:10.1371/journal.pone.0186659), 2017-12-06
Supplement: pone.0186659.s006.pdf [file pone.0186659.s006.pdf]

**S4 Table. Comparison of CKD patients with and without presence of CVD**

|                                           | <b>Non- CVD (n=661)</b> | <b>CVD (n=370)</b> | <b>P value</b>    |
|-------------------------------------------|-------------------------|--------------------|-------------------|
| <b>Age (years)</b>                        | 53(31-70)               | 64(48-78)          | <b>&lt;0.0001</b> |
| <b>Gender, male (%)</b>                   | 395 (60)                | 262 (71)           | <b>0.0004</b>     |
| <b>Diabetes mellitus, n(%)</b>            | 123(19)                 | 146 (39)           | <b>&lt;0.0001</b> |
| <b>Dialysis, n (%)</b>                    | 163(25)                 | 136 (37)           | <b>&lt;0.0001</b> |
| <b>SGA&gt;1, n (%)</b>                    | 152 (23)                | 168(45)            | <b>&lt;0.0001</b> |
| <b>% HGS (n=580/318)</b>                  | 98(60-127)              | 70(38-102)         | <b>&lt;0.0001</b> |
| <b>BMI (kg/m<sup>2</sup>)</b>             | 24.4(19.7-30.5)         | 24.6(20.0-30.8)    | 0.60              |
| <b>LBMI (kg/m<sup>2</sup>; n=557/333)</b> | 17.2 (13.9-20.6)        | 17.1 (13.8-20.3)   | 0.54              |
| <b>FBMI (kg/m<sup>2</sup>; n=557/333)</b> | 7.0 (4.0-11.3)          | 7.7 (4.5-11.5)     | <b>0.01</b>       |
| <b>S-Albumin (g/L)</b>                    | 35(29-41)               | 34(26-39)          | <b>&lt;0.0001</b> |
| <b>hsCRP (mg/L)</b>                       | 2.4(0.4-15.8)           | 6.8(0.8-39)        | <b>&lt;0.0001</b> |

Data presented as median (10<sup>th</sup> - 90<sup>th</sup> percentile), number or percentage.

Abbreviations: CVD, cardiovascular disease; SGA, subjective global assessment; % HGS, handgrip strength as percentage of the controls; BMI, body mass index; LBMI, lean body mass index; FBMI, fat body mass index; S-Albumin, serum-albumin; hs CRP, high sensitivity C-reactive protein
