# Supplementary material for: Clinical global assessment of nutritional status as predictor of mortality in chronic kidney disease patients
Source: PubMed Central journal article supplement (PMC5718431; doi:10.1371/journal.pone.0186659), 2017-12-06
Supplement: pone.0186659.s007.pdf [file pone.0186659.s007.pdf]

**S5 Table. Comparison of CKD patients with and without presence of diabetes mellitus**

|                                           | <b>Non- Diabetes mellitus<br/>(n=762)</b> | <b>Diabetes mellitus<br/>(n=269)</b> | <b>P value</b>    |
|-------------------------------------------|-------------------------------------------|--------------------------------------|-------------------|
| <b>Age (years)</b>                        | 57(33-75)                                 | 59(37-72)                            | 0.30              |
| <b>Gender, male (%)</b>                   | 474 (62)                                  | 183 (68)                             | 0.09              |
| <b>CVD, n (%)</b>                         | 224 (29)                                  | 146 (54)                             | <b>&lt;0.0001</b> |
| <b>Dialysis, n (%)</b>                    | 241(32)                                   | 58(22)                               | <b>0.001</b>      |
| <b>SGA&gt;1, n (%)</b>                    | 221 (29)                                  | 99(37)                               | <b>0.02</b>       |
| <b>%HGS (n=736/249)</b>                   | 89(52-117)                                | 72(47-107)                           | <b>&lt;0.0001</b> |
| <b>BMI (kg/m<sup>2</sup>)</b>             | 24.2(19.5-30.0)                           | 25.9(21.0-32.9)                      | <b>&lt;0.0001</b> |
| <b>LBMI (kg/m<sup>2</sup>; n=665/225)</b> | 17.1 (13.8-20.4)                          | 17.2 (14.1-20.6)                     | 0.10              |
| <b>FBMI (kg/m<sup>2</sup>; n=665/225)</b> | 6.8 (3.9-10.6)                            | 8.4 (4.9-12.1)                       | <b>&lt;0.0001</b> |
| <b>S-Albumin (g/L)</b>                    | 35(29-41)                                 | 33(25-39)                            | <b>&lt;0.0001</b> |
| <b>hs CRP (mg/L)</b>                      | 2.9(0.5-26)                               | 4.7(0.6-28.5)                        | <b>0.0008</b>     |

Data presented as median (10<sup>th</sup> - 90<sup>th</sup> percentile), number or percentage.

Abbreviations: CVD, cardiovascular disease; SGA, subjective global assessment; % HGS, handgrip strength as percentage of the controls; BMI, body mass index; LBMI, lean body mass index; FBMI, fat body mass index; S-Albumin, serum-albumin; hs CRP, high sensitivity C-reactive protein
