# Supplementary material for: Clinical global assessment of nutritional status as predictor of mortality in chronic kidney disease patients
Source: PubMed Central journal article supplement (PMC5718431; doi:10.1371/journal.pone.0186659), 2017-12-06
Supplement: pone.0186659.s008.pdf [file pone.0186659.s008.pdf]

**S6 Table. Comparison of dialysis patients and non-dialysis CKD patients**

|                                             | <b>Dialysis</b><br>(n=299) | <b>Non-dialysis</b><br>(n=732) | <b>P value</b>    |
|---------------------------------------------|----------------------------|--------------------------------|-------------------|
| <b>Age</b> (years)                          | 62(34-80)                  | 56(35-70)                      | <b>&lt;0.0001</b> |
| <b>Gender, male</b> (%)                     | 180 (60)                   | 477(65)                        | 0.13              |
| <b>Diabetes mellitus, n</b> (%)             | 58 (19)                    | 211 (29)                       | <b>0.001</b>      |
| <b>CVD, n</b> (%)                           | 136 (46)                   | 234 (32)                       | <b>&lt;0.0001</b> |
| <b>SGA&gt;1, n</b> (%)                      | 131 (44)                   | 189(26)                        | <b>&lt;0.0001</b> |
| <b>% HGS</b> (n=289/697)                    | 70 (42-108)                | 91 (56-119)                    | <b>&lt;0.0001</b> |
| <b>BMI</b> (kg/m <sup>2</sup> )             | 24 (19 -30)                | 25 (20 -31)                    | <b>0.003</b>      |
| <b>LBMI</b> (kg/m <sup>2</sup> ; n=280/610) | 17.0 (13.8-20.5)           | 17.2 (13.9-20.5)               | 0.14              |
| <b>FBMI</b> (kg/m <sup>2</sup> ; n=280/610) | 6.9 (3.8-11.3)             | 7.4 (4.4-11.5)                 | <b>0.02</b>       |
| <b>S-Albumin</b> (g/L)                      | 34 (28-40)                 | 35 (27-41)                     | <b>0.008</b>      |
| <b>hsCRP</b> (mg/L)                         | 4.1 (0.4-32)               | 3.1 (0.5-24)                   | 0.09              |

Data presented as median (10<sup>th</sup> - 90<sup>th</sup> percentile), number or percentage.

Abbreviations: CVD, cardiovascular disease; SGA, subjective global assessment; % HGS, handgrip strength as percentage of the controls; BMI, body mass index; LBMI, lean body mass index; FBMI, fat body mass index; S-Albumin, serum-albumin; hs CRP, high sensitivity C-reactive protein
