# Supplementary material for: Clinical global assessment of nutritional status as predictor of mortality in chronic kidney disease patients
Source: PubMed Central journal article supplement (PMC5718431; doi:10.1371/journal.pone.0186659), 2017-12-06
Supplement: pone.0186659.s009.pdf [file pone.0186659.s009.pdf]

**S7 Table. Comparison of CKD patients with % HGS  $\geq$  75 and % HGS  $<$ 75**

|                                           | <b>% HGS <math>\geq</math> 75</b><br>(n=596) | <b>% HGS <math>&lt;</math>75</b><br>(n=389) | <b>P value</b>    |
|-------------------------------------------|----------------------------------------------|---------------------------------------------|-------------------|
| <b>Age (years)</b>                        | 53(32-70)                                    | 64(44-79)                                   | <b>&lt;0.0001</b> |
| <b>Gender, male (%)</b>                   | 398 (67)                                     | 233 (60)                                    | <b>0.03</b>       |
| <b>Diabetes mellitus, n (%)</b>           | 111 (19)                                     | 138 (35)                                    | <b>&lt;0.0001</b> |
| <b>CVD, n (%)</b>                         | 135 (23)                                     | 216 (56)                                    | <b>&lt;0.0001</b> |
| <b>Dialysis, n (%)</b>                    | 119(20)                                      | 170(44)                                     | <b>&lt;0.0001</b> |
| <b>SGA<math>&gt;</math>1, n (%)</b>       | 105 (18)                                     | 192(49)                                     | <b>&lt;0.0001</b> |
| <b>BMI (kg/m<sup>2</sup>)</b>             | 24.9(20.5-30.6)                              | 23.8(19.0-30.3)                             | <b>0.0002</b>     |
| <b>LBMI (kg/m<sup>2</sup>; n=528/346)</b> | 17.5 (14.5-20.9)                             | 16.4 (13.6-19.8)                            | <b>&lt;0.0001</b> |
| <b>FBMI (kg/m<sup>2</sup>; n=528/346)</b> | 7.1 (4.1-11.5)                               | 7.4 (4.1-11.2)                              | 0.61              |
| <b>S-Albumin (g/L)</b>                    | 36(29-41)                                    | 33(26-39)                                   | <b>&lt;0.0001</b> |
| <b>hsCRP (mg/L)</b>                       | 2.3(0.4-16.2)                                | 6.3(0.8-35)                                 | <b>&lt;0.0001</b> |

Data presented as median (10<sup>th</sup> - 90<sup>th</sup> percentile), number or percentage.

Abbreviations: % HGS, handgrip strength as percentage of the controls; CVD, cardiovascular disease; SGA, subjective global assessment; BMI, body mass index; LBMI, lean body mass index; FBMI, fat body mass index; S-Albumin, serum-albumin; hsCRP, high sensitivity C-reactive protein
