# Supplementary material for: Clinical global assessment of nutritional status as predictor of mortality in chronic kidney disease patients
Source: PubMed Central journal article supplement (PMC5718431; doi:10.1371/journal.pone.0186659), 2017-12-06
Supplement: pone.0186659.s010.pdf [file pone.0186659.s010.pdf]

**S8 Table. Comparison of CKD patients with LBMI <19.38 (kg/m<sup>2</sup>) and LBMI ≥19.38 (kg/m<sup>2</sup>)**

|                                 | <b>LBMI &lt;19.38 (kg/m<sup>2</sup>)</b><br>(n=721) | <b>LBMI ≥19.38 (kg/m<sup>2</sup>)</b><br>(n=169) | <b>P value</b>    |
|---------------------------------|-----------------------------------------------------|--------------------------------------------------|-------------------|
| <b>Age (years)</b>              | 57(34-74)                                           | 59(36-75)                                        | 0.09              |
| <b>Gender, male (%)</b>         | 413 (57)                                            | 157 (93)                                         | <b>&lt;0.0001</b> |
| <b>Diabetes mellitus, n (%)</b> | 177 (25)                                            | 48 (28)                                          | <b>0.30</b>       |
| <b>CVD, n (%)</b>               | 270 (38)                                            | 63 (37)                                          | 0.97              |
| <b>Dialysis, n(%)</b>           | 231(32)                                             | 49(29)                                           | 0.44              |
| <b>SGA&gt;1, n (%)</b>          | 234 (32)                                            | 36(21)                                           | <b>0.004</b>      |
| <b>% HGS (n=707/167)</b>        | 81 (48-112)                                         | 99 (58-128)                                      | <b>&lt;0.0001</b> |
| <b>BMI (kg/m<sup>2</sup>)</b>   | 24.6(19.9-30.4)                                     | 24.4(19.5-31.2)                                  | 1.00              |
| <b>FBMI (kg/m<sup>2</sup>)</b>  | 7.9 (4.4-13.6)                                      | 7.1 (4.0-11.0)                                   | <b>0.001</b>      |
| <b>S-Albumin (g/L)</b>          | 35 (29-41)                                          | 35 (27-41)                                       | 0.14              |
| <b>hsCRP (mg/L)</b>             | 3.5 (0.6-21)                                        | 3.5 (0.5-27)                                     | 0.96              |

Data presented as median (10<sup>th</sup> - 90<sup>th</sup> percentile), number or percentage.

Abbreviations: LBMI, lean body mass index; CVD, cardiovascular disease; SGA, subjective global assessment; % HGS, handgrip strength as percentage of the controls; BMI, body mass index; FBMI, fat body mass index; S-Albumin, serum-albumin; hsCRP, high sensitivity C-reactive protein
