# Supplementary material for: Clinical global assessment of nutritional status as predictor of mortality in chronic kidney disease patients
Source: PubMed Central journal article supplement (PMC5718431; doi:10.1371/journal.pone.0186659), 2017-12-06
Supplement: pone.0186659.s011.pdf [file pone.0186659.s011.pdf]

**S9 Table. Comparison of CKD patients with FBMI <9.15 (kg/m<sup>2</sup>) and FBMI ≥9.15 (kg/m<sup>2</sup>)**

|                                 | <b>FBMI &lt;9.15(kg/m<sup>2</sup>)</b><br>(n=651) | <b>FBMI ≥9.15(kg/m<sup>2</sup>)</b><br>(n=239) | <b>P value</b>    |
|---------------------------------|---------------------------------------------------|------------------------------------------------|-------------------|
| <b>Age (years)</b>              | 58(33-75)                                         | 60(43-73)                                      | <b>0.0007</b>     |
| <b>Gender, male (%)</b>         | 473 (73)                                          | 97 (41)                                        | <b>&lt;0.0001</b> |
| <b>Diabetes mellitus, n (%)</b> | 136 (21)                                          | 89 (37)                                        | <b>&lt;0.0001</b> |
| <b>CVD, n (%)</b>               | 239 (37)                                          | 94 (39)                                        | 0.48              |
| <b>Dialysis, n (%)</b>          | 209(32)                                           | 71(30)                                         | 0.49              |
| <b>SGA&gt;1, n (%)</b>          | 213 (33)                                          | 57(24)                                         | <b>0.01</b>       |
| <b>%HGS (n=640/234)</b>         | 84 (48-116)                                       | 84 (54-111)                                    | 0.72              |
| <b>BMI (kg/m<sup>2</sup>)</b>   | 23.1(19.2-27.2)                                   | 28.4(24.4-34.7)                                | <b>&lt;0.0001</b> |
| <b>LBMI (kg/m<sup>2</sup>)</b>  | 17.1 (13.7-20.2)                                  | 17.4 (14.5-21.2)                               | <b>0.0006</b>     |
| <b>S-Albumin (g/L)</b>          | 35 (28-40)                                        | 35 (28-41)                                     | 0.34              |
| <b>hsCRP (mg/L)</b>             | 4.4 (0.9-29)                                      | 3.1 (0.5-25)                                   | <b>0.0008</b>     |

Data presented as median (10<sup>th</sup> - 90<sup>th</sup> percentile), number or percentage.

Abbreviations: FBMI, fat body mass index; CVD, cardiovascular disease; SGA, subjective global assessment; % HGS, handgrip strength as percentage of the controls; BMI, body mass index; LBMI, lean body mass index; S-Albumin, serum-albumin; hsCRP, high sensitivity C-reactive protein
