# Supplementary material for: Clinical global assessment of nutritional status as predictor of mortality in chronic kidney disease patients
Source: PubMed Central journal article supplement (PMC5718431; doi:10.1371/journal.pone.0186659), 2017-12-06
Supplement: pone.0186659.s012.pdf [file pone.0186659.s012.pdf]

**S10 Table. Comparison of CKD patients with different BMI values according to division recommended by the World Health Organization**

|                                                 | <b>Underweight</b><br>(BMI < 18.5, n=48) | <b>Normal</b><br>(18.5 ≤ BMI ≤ 24.99, n=509) | <b>Overweight</b><br>(25 ≤ BMI < 30, n=346) | <b>Obese</b><br>(BMI ≥ 30, n=128) | <b>P value</b>    |
|-------------------------------------------------|------------------------------------------|----------------------------------------------|---------------------------------------------|-----------------------------------|-------------------|
| <b>Age (years)</b>                              | 54.5(29-80)                              | 56(32-75)                                    | 59(38-74)                                   | 58(39-73)                         | 0.09              |
| <b>Gender, male (%)</b>                         | 17 (35)                                  | 324 (64)                                     | 244 (71)                                    | 72 (56)                           | <b>&lt;0.0001</b> |
| <b>Diabetes mellitus, n(%)</b>                  | 7 (15)                                   | 109 (21)                                     | 98 (28)                                     | 55 (43)                           | <b>&lt;0.0001</b> |
| <b>CVD, n (%)</b>                               | 19 (40)                                  | 178 (35)                                     | 124 (36)                                    | 49 (38)                           | 0.94              |
| <b>Dialysis, n (%)</b>                          | 22 (46)                                  | 157 (31)                                     | 92 (27)                                     | 28 (22)                           | <b>0.01</b>       |
| <b>SGA&gt;1, n (%)</b>                          | 34 (71)                                  | 195(38)                                      | 65 (19)                                     | 26 (20)                           | <b>&lt;0.0001</b> |
| <b>%HGS (n=44/490/333/118)</b>                  | 64 (32-102)                              | 81 (48-114)                                  | 89 (56-118)                                 | 86 (51-111)                       | <b>&lt;0.0001</b> |
| <b>LBMI (kg/m<sup>2</sup>; n=42/454/301/93)</b> | 13.0 (11.6-15.2)                         | 15.9 (13.7-18.8)                             | 18.4 (16.1-20.8)                            | 20.4 (17.4-24.7)                  | <b>&lt;0.0001</b> |
| <b>FBMI (kg/m<sup>2</sup>; n=42/454/301/93)</b> | 4.3 (2.3-5.9)                            | 6.0 (3.7-8.7)                                | 8.7 (6.2-11.6)                              | 14.2(9.1-16.2)                    | <b>&lt;0.0001</b> |
| <b>S-Albumin (g/L)</b>                          | 33(24-40)                                | 35(27-41)                                    | 35(29-40)                                   | 34(28-40)                         | 0.09              |
| <b>hsCRP (mg/L)</b>                             | 4.3(0.5-49.1)                            | 3 (0.4-27)                                   | 3.3(0.6-24)                                 | 4.2(1.1-27.5)                     | <b>0.03</b>       |

Data presented as median (10<sup>th</sup> - 90<sup>th</sup> percentile), number or percentage.

Abbreviations: BMI, body mass index; CVD, cardiovascular disease; SGA, subjective global assessment; % HGS, handgrip strength as percentage of the controls; LBMI, lean body mass index; FBMI, fat body mass index; S-Albumin, serum-albumin; hsCRP, high sensitivity C-reactive protein
