# Supplementary material for: Clinical global assessment of nutritional status as predictor of mortality in chronic kidney disease patients
Source: PubMed Central journal article supplement (PMC5718431; doi:10.1371/journal.pone.0186659), 2017-12-06
Supplement: pone.0186659.s013.pdf [file pone.0186659.s013.pdf]

**S11 Table. Comparison of CKD patients with serum albumin <35 g/L and serum albumin ≥35 g/L**

|                                           | <b>S-Albumin &lt;35 g/L</b><br>(n=484) | <b>S-Albumin ≥35 g/L</b><br>(n=547) | <b>P value</b>    |
|-------------------------------------------|----------------------------------------|-------------------------------------|-------------------|
| <b>Age (years)</b>                        | 59(36-75)                              | 56(32-74)                           | <b>0.01</b>       |
| <b>Gender, male (%)</b>                   | 292 (60)                               | 365 (67)                            | <b>0.03</b>       |
| <b>Diabetes mellitus, n(%)</b>            | 164 (34)                               | 105 (19)                            | <b>&lt;0.0001</b> |
| <b>CVD, n (%)</b>                         | 204 (42)                               | 166 (30)                            | <b>&lt;0.0001</b> |
| <b>Dialysis, n (%)</b>                    | 163(34)                                | 136(25)                             | <b>0.001</b>      |
| <b>SGA&gt;1, n (%)</b>                    | 198 (41)                               | 122(22)                             | <b>&lt;0.0001</b> |
| <b>% HGS (n=453/533)</b>                  | 74 (44-111)                            | 93 (56-116)                         | <b>&lt;0.0001</b> |
| <b>BMI (kg/m<sup>2</sup>)</b>             | 24.5(19.4-30.9)                        | 24.5(20.2-30.4)                     | 0.91              |
| <b>LBMI (kg/m<sup>2</sup>; n=412/478)</b> | 17.0 (13.7-20.3)                       | 17.3 (14.0-20.7)                    | 0.55              |
| <b>FBMI (kg/m<sup>2</sup>; n=412/478)</b> | 7.2 (4.0-11.7)                         | 7.3 (4.2-11.0)                      | 0.94              |
| <b>hsCRP (mg/L)</b>                       | 6.4 (0.6-42.5)                         | 2.4 (0.4–13.0)                      | <b>&lt;0.0001</b> |

Data presented as median (10<sup>th</sup> - 90<sup>th</sup> percentile), number or percentage.

Abbreviations: S-Albumin, serum-albumin; CVD, cardiovascular disease; SGA, subjective global assessment; % HGS, handgrip strength as percentage of the controls; BMI, body mass index; LBMI, lean body mass index; FBMI, fat body mass index; hsCRP, high sensitivity C-reactive protein.
