# Supplementary material for: Clinical global assessment of nutritional status as predictor of mortality in chronic kidney disease patients
Source: PubMed Central journal article supplement (PMC5718431; doi:10.1371/journal.pone.0186659), 2017-12-06
Supplement: pone.0186659.s014.pdf [file pone.0186659.s014.pdf]

**S12 Table. Comparison of CKD patients with inflammation (hsCRP  $\geq$ 10 mg/L) and without inflammation (hsCRP <10 mg/L).**

|                                           | hsCRP<10 mg/L<br>(n=773) | hsCRP $\geq$ 10 mg/L<br>(n=258) | P value           |
|-------------------------------------------|--------------------------|---------------------------------|-------------------|
| <b>Age (years)</b>                        | 56(32-74)                | 61(43-75)                       | <b>&lt;0.0001</b> |
| <b>Gender, male (%)</b>                   | 486 (63)                 | 171 (66)                        | 0.32              |
| <b>Diabetes mellitus, n (%)</b>           | 186 (24)                 | 83 (32)                         | <b>0.01</b>       |
| <b>CVD, n (%)</b>                         | 224 (29)                 | 146 (57)                        | <b>&lt;0.0001</b> |
| <b>Dialysis, n (%)</b>                    | 85(33)                   | 214(28)                         | 0.11              |
| <b>SGA&gt;1, n (%)</b>                    | 189 (24)                 | 131(51)                         | <b>&lt;0.0001</b> |
| <b>%HGS (n=744/241)</b>                   | 89(56-119)               | 70(42-103)                      | <b>&lt;0.0001</b> |
| <b>BMI (kg/m<sup>2</sup>)</b>             | 24.6(19.9-30.4)          | 24.4(19.5-31.2)                 | 1.00              |
| <b>LBMI (kg/m<sup>2</sup>; n=668/222)</b> | 17.3 (13.8-20.6)         | 16.8 (14.1-20.2)                | 0.08              |
| <b>FBMI (kg/m<sup>2</sup>; n=668/222)</b> | 7.1 (4.1-11.0)           | 7.6 (4.1-12.4)                  | 0.10              |
| <b>S-Albumin (g/L)</b>                    | 36(29-41)                | 32(25-37)                       | <b>&lt;0.0001</b> |

Data presented as median (10<sup>th</sup> - 90<sup>th</sup> percentile), number or percentage.

Abbreviations: hsCRP, high sensitivity C-reactive protein; CVD, cardiovascular disease; SGA, subjective global assessment; % HGS, handgrip strength as percentage of the controls; BMI, body mass index; LBMI, lean body mass index; FBMI, fat body mass index; S-Albumin, serum-albumin
