# Supplementary material for: Clinical global assessment of nutritional status as predictor of mortality in chronic kidney disease patients
Source: PubMed Central journal article supplement (PMC5718431; doi:10.1371/journal.pone.0186659), 2017-12-06
Supplement: pone.0186659.s015.pdf [file pone.0186659.s015.pdf]

**S13 Table. Agreement - expressed as kappa coefficient – of nutritional markers with presence of malnutrition (SGA score >1) at baseline.**

| parameters                                | Kappa coefficient | 95% CI    |
|-------------------------------------------|-------------------|-----------|
| % HGS < 74% <sup>a</sup>                  | 0.31              | 0.25-0.37 |
| BMI < 24.2 kg/m <sup>2</sup> <sup>a</sup> | 0.23              | 0.17-0.28 |
| LBMI < 17 kg/m <sup>2</sup> <sup>a</sup>  | 0.19              | 0.13-0.25 |
| Albumin < 34 g/L <sup>a</sup>             | 0.20              | 0.14-0.26 |
| hsCRP > 4.7 mg/L <sup>a</sup>             | 0.22              | 0.17-0.28 |

Abbreviations: 95% CI, 95% confidence interval; % HGS, handgrip strength as percentage of the controls; BMI, body mass index; LBMI, lean body mass index; hsCRP, high sensitivity C-reactive protein.

<sup>a</sup> Cut-offs defined by ROC curve analysis.

Interpretation of agreement according to kappa coefficient values: 0–0.20 indicate slight, 0.21–0.40 fair, 0.41–0.60 moderate, 0.61–0.80 substantial, and 0.81–1 almost perfect agreement.
