# Supplementary material for: Clinical global assessment of nutritional status as predictor of mortality in chronic kidney disease patients
Source: PubMed Central journal article supplement (PMC5718431; doi:10.1371/journal.pone.0186659), 2017-12-06
Supplement: pone.0186659.s016.pdf [file pone.0186659.s016.pdf]

**S14 Table. All-cause mortality risk for death occurring within 60 months based on imputed baseline data in 732 CKD non-dialysis patients, adjusted for all confounders, and expressed as relative risk ratio (95% CI).**

|                                                      | Relative Risk Ratio<br>(95% CI) | P value           |
|------------------------------------------------------|---------------------------------|-------------------|
| SGA>1, malnourished versus well nourished            | 1.15 (1.07 – 1.23)              | <b>&lt;0.0001</b> |
| Age, > 55 versus <55 years <sup>a</sup>              | 1.09 (1.03 – 1.15)              | <b>0.003</b>      |
| Gender, male versus female                           | 1.03 (0.97 – 1.10)              | 0.32              |
| Diabetes mellitus, presence versus absence           | 1.09 (1.03 – 1.16)              | <b>0.005</b>      |
| CVD (yes/no), presence versus absence                | 1.15 (1.08 – 1.22)              | <b>&lt;0.0001</b> |
| % HGS, >81.48 versus <81.48 <sup>a</sup>             | 1.21 (1.14 – 1.29)              | <b>&lt;0.0001</b> |
| LBMI, >19 versus < 19 kg/m <sup>2</sup> <sup>a</sup> | 1.06 (0.99 – 1.12)              | 0.10              |
| Albumin, >30 versus <30 g/L <sup>a</sup>             | 1.07 (1.01 – 1.13)              | <b>0.02</b>       |
| hsCRP, > 4.8 versus < 4.8 mg/L <sup>a</sup>          | 1.08 (1.02 – 1.14)              | <b>0.007</b>      |
| Calendar year, 1994- 1999 vs 2010 - 2016             | 1.14 (1.05 – 1.24)              | <b>0.002</b>      |
| Calendar year, 2000- 2004 vs 2010 - 2016             | 1.16 (1.08 – 1.25)              | <b>&lt;0.0001</b> |
| Calendar year, 2005- 2009 vs 2010 - 2016             | 1.13 (1.05 – 1.23)              | <b>0.002</b>      |

Abbreviations: 95% CI, 95% confidence interval; CKD, chronic kidney disease; SGA, subjective global assessment; CVD, cardiovascular disease; % HGS, handgrip strength as percentage of the controls; LBMI, lean body mass index; hsCRP, high sensitivity C-reactive protein.

<sup>a</sup> Cut-offs defined by ROC curve analysis.
