# Supplementary material for: Clinical global assessment of nutritional status as predictor of mortality in chronic kidney disease patients
Source: PubMed Central journal article supplement (PMC5718431; doi:10.1371/journal.pone.0186659), 2017-12-06
Supplement: pone.0186659.s017.pdf [file pone.0186659.s017.pdf]

**S15 Table. All-cause mortality risk for death occurring within 60 months based on imputed baseline data in 299 CKD dialysis patients, adjusted for all confounders, and expressed as relative risk ratio (95% CI).**

|                                                      | Relative Risk Ratio<br>(95% CI) | P value           |
|------------------------------------------------------|---------------------------------|-------------------|
| SGA>1, malnourished versus well nourished            | 1.19 (1.08 – 1.31)              | <b>0.0003</b>     |
| Age, > 67 versus <67 years <sup>a</sup>              | 1.26 (1.14 – 1.40)              | <b>&lt;0.0001</b> |
| Gender, male versus female                           | 1.19 (1.08 – 1.32)              | <b>0.0007</b>     |
| Diabetes mellitus, presence versus absence           | 1.12 (1.00 – 1.25)              | 0.05              |
| CVD (yes/no), presence versus absence                | 1.06 (0.96 – 1.18)              | 0.24              |
| % HGS, >72.09 versus <72.09 <sup>a</sup>             | 1.20 (1.07 – 1.33)              | <b>0.001</b>      |
| LBMI ,>16 versus < 16 kg/m <sup>2</sup> <sup>a</sup> | 1.08 (0.97 – 1.21)              | 0.15              |
| Albumin, >33 versus <33 g/L <sup>a</sup>             | 1.02 (0.93 – 1.12)              | 0.64              |
| hsCRP, > 2.6 versus < 2.6 mg/L <sup>a</sup>          | 1.04 (0.94 – 1.15)              | 0.43              |
| Calendar year, 2000- 2004 vs 2010 - 2016             | 1.18 (1.04 – 1.33)              | <b>0.01</b>       |
| Calendar year, 2005- 2009 vs 2010 - 2016             | 1.23 (1.05 – 1.46)              | <b>0.01</b>       |

Abbreviations: 95% CI, 95% confidence interval; CKD, chronic kidney disease; SGA, subjective global assessment; CVD, cardiovascular disease; % HGS, handgrip strength as percentage of the controls; LBMI, lean body mass index; hsCRP, high sensitivity C-reactive protein.

<sup>a</sup> Cut-offs defined by ROC curve analysis.
